# Supplementary material for: Molecular characterization of an anthocyanin-related glutathione S-transferase gene in Japanese gentian with the CRISPR/Cas9 system
Source: PubMed Central journal article supplement (PMC7409652; doi:10.1186/s12870-020-02565-3), 2020-08-06
Supplement: 12870_2020_2565_MOESM1_ESM.pdf [file 12870_2020_2565_MOESM1_ESM.pdf]

**Supplementary Table S1.** Sanger sequencing analysis of the PCR amplicons of the DNA from *GST1* genome-edited lines and the WT control

| Line no. | Allele | Number of sequenced clones |        | Target1                 | In/Del                   | Target2                 | In/Del                  |                         |
|----------|--------|----------------------------|--------|-------------------------|--------------------------|-------------------------|-------------------------|-------------------------|
| WT       | 1, 2   | Total                      | Number | GGGTATACCCACCGATTCTTCGG |                          | GCTGATATGTGCCACCTGCCGGG |                         |                         |
| #1       | 1      | 3                          | 2      | 2                       | GGGTATACC-----  -----    | -24                     | GCTGATATGTGCCACCTGCCGGG | 0                       |
|          | 2      |                            | 1      | 1                       | GGGTATACCCACCGATTCTTCGG  | 0                       | GCTGATATGTGCCACCTGCCGGG | +1                      |
| #3       | 1      | 5                          | 0      | 0                       |                          | No detection            |                         |                         |
|          | 2      |                            | 5      | 4                       | GGGTATAC-----CTTCGG      | -9                      | GCTGATATGTGCCACCTGCCGGG | 0                       |
|          |        |                            |        | 1                       | GGGTATAC-----CTTCGG      | -9                      | GCTGATATGTGCCACCTGCCGGG | +1                      |
| #8       | 1      | 5                          | 9      | 9                       | GGGTATACC-----  -----    | -15                     | GCTGATATGTGCCAC--GCCGGG | -2                      |
|          | 2      |                            | 2      | 1                       | GGGTATACCCACCGATTCTTCGG  | 0                       | GCTGATATGTGC-----GCCGGG | -5, +1                  |
|          |        |                            | 1      | 1                       | GGGTATACCCACCGATTCTTCGG  | 0                       | GCTGATATGTGC-----GCCGGG | -5, +2                  |
| #12      | 1      | 7                          | 5      | 1                       | -----  -----TTCGG        | -19                     | GCTGATAT-----CTGCCGGG   | -7                      |
|          |        |                            | 1      | 1                       | -----  -----TTCGG        | -19                     | GCTGATATGTGCC-----GGGGG | -7, +3                  |
|          |        |                            | 3      |                         | -----  -----TTCGG        | -19                     | GCTGATATGT-----GCCGGG   | -7                      |
|          |        |                            | 2      | 2                       | 2                        | GGTATACCCACCGA--CTTCGG  | -2                      | GCTGATATGTGCCAC--GCCGGG |
| #13      | 1      | 7                          | 7      | 7                       | GGGTATACCCACCGA--TCTTCGG | -1                      | GCTGATATGTGC-----GCCGGG | -5                      |
|          | 2      |                            | 0      | 0                       |                          |                         |                         |                         |
| #23      | 1      | 5                          | 5      | 5                       | GGGTATACCCACCGATTCTTCGG  | 0                       | GCTGATATGTGCCAC--GCCGGG | -2                      |
|          | 2      |                            | 0      | 0                       |                          |                         |                         |                         |
| #29      | 1      | 9                          | 0      | 0                       |                          | No detection            |                         |                         |
|          | 2      |                            | 9      | 9                       | GGGTATACCCA-----CTTCGG   | -6                      | GCTGATATGTGC-----GCCGGG | -5                      |

**Supplementary Table S2.** Next-generation sequencing analysis of the PCR amplicons of the DNA and RNA from *GST1* genome-edited lines and the WT control

| Line no. | Allele | Number of fragments (DNA) | Number of fragments (RNA) | Target1                    | In/Del | Target2                 | In/Del | Flower color phenotype |
|----------|--------|---------------------------|---------------------------|----------------------------|--------|-------------------------|--------|------------------------|
| WT       | 1      | 9,782                     | 20,438                    | GGGTATACCCACCGATTCTTCGG    | 0      | GCTGATATGTGCCACCTGCCGGG | 0      | Blue                   |
|          | 2      | 10,199                    | 3,992                     | GGGTATACCCACCGATTCTTCGG    | 0      | GCTGATATGTGCCACCTGCCGGG | 0      |                        |
| #3       | 1      | -                         | -                         | Large insertion            |        |                         | -      | Bale blue              |
|          | 2      | 25,763                    | 31,764                    | GGGTATAC-----CTTCGG        | -9     | GCTGATATGTGCCACCTGCCGGG | 0      |                        |
| #12      | 1      | 27,408                    | 17,831                    | -----TCGG                  | -19    | GCTGATATGT-----GCCGGG   | -7     | Almost white color     |
|          | 2      | 26,029                    | 3,222                     | GGGTATACCCACCGA--CTTCGG    | -2     | GCTGATATGTGCCAC--GCCGGG | -2     |                        |
| #13      | 1      | 12,587                    | 18,989                    | GGGTATACCCACCGA-TCTTCGG    | -1     | GCTGATATGTGC-----GCCGGG | -5     | Almost white color     |
|          | 2      | 13,805                    | 1,728                     | GGGTATACCCAC-----CTTCGG    | -5     | GCTGATATGTGCCACCTGCCGGG | 0      |                        |
| #23      | 1      | 19,080                    | 29,053                    | GGGTATACCCACCGATTCTTCGG    | 0      | GCTGATATGTGCCAC--GCCGGG | -2     | Almost white color     |
|          | 2      | 27,740                    | 12,542                    | GGGTATACC----- -----GCCGGG |        |                         | -129   |                        |
| #29      | 1      | -                         | -                         | Large insertion            |        |                         | -      | Almost white color     |
|          | 2      | 24,369                    | 18,889                    | GGGTATACCCA-----CTTCGG     | -6     | GCTGATATGTGC-----GCCGGG | -5     |                        |

Supplementary Table S3. Primers used in this study

| #                                                | Primer name           | Sequence (5'-3')                                           | Index     |
|--------------------------------------------------|-----------------------|------------------------------------------------------------|-----------|
| <b>Isolation of GST1</b>                         |                       |                                                            |           |
| <b>3' RACE PCR</b>                               |                       |                                                            |           |
| #276                                             | GST1-1_3race_first    | GTCGATCAATGGCTGGAAGT                                       |           |
| #277                                             | GST1-1_3race_nested   | AACAAGCTCCAAAACGTGCT                                       |           |
| <b>Full-length amplification</b>                 |                       |                                                            |           |
| #325                                             | Alb.GST1_5'UTR_F1     | TAAAGGTTTAGCAGAAGAAAAATAGCA                                |           |
| #326                                             | Alb.GST1_3'UTR_R1     | CCGTATTAACATTTCTACTACCACT                                  |           |
| <b>Genome sequence for 2<sup>nd</sup> intron</b> |                       |                                                            |           |
| #98                                              | GST1_exon2_Fw         | TTCCTGTCATTGAAGATGGTGA                                     |           |
| #99                                              | GST1_exon3_Rv         | AAGTGGTCCGAGGAGGTTT                                        |           |
| <b>Direct sequence</b>                           |                       |                                                            |           |
| #154                                             | GST1_U238             | GACAAGGGACCAAACCTCCT                                       |           |
| #155                                             | GST1_L639             | TTTCATCAAATCGAGCACTTTC                                     |           |
| <b>Selection of genome-edited transformants</b>  |                       |                                                            |           |
| #61                                              | Cas9U1898             | AAGAAAGGCTCAAGACCTACGCTCAT                                 |           |
| #62                                              | Cas9L2260             | TCGATCACGATGTTCTCAGGCTTATG                                 |           |
| <b>Amplicon sequence</b>                         |                       |                                                            |           |
| <b>1st PCR primer sets</b>                       |                       |                                                            |           |
| #404                                             | Alb.GST1tar1,2_D50X-2 | ACACTCTTTCCCTACACGACGCTCTCCGATCIGACAAGGGACCAAACCTCCT       |           |
| #365                                             | Alb.GST2tar1,2_D70X   | TGACTGGAGTTCAGACGTGTGCTCTCCGATCICCTTAATCAAATCCCCAACG       |           |
| <b>2nd PCR forward primers</b>                   |                       |                                                            |           |
|                                                  | <b>D503</b>           | AATGATACGGCGACCACCGAGATCTACACCCTATCCTACACTCTTTCCCTACACGACG | CCTATCCT  |
|                                                  | <b>D504</b>           | AATGATACGGCGACCACCGAGATCTACACGGCTCTGAACACTCTTTCCCTACACGACG | GGCTCTGA  |
|                                                  | <b>D505</b>           | AATGATACGGCGACCACCGAGATCTACACAGGCGAAGACACTCTTTCCCTACACGACG | AGGCGAAG  |
|                                                  | <b>D506</b>           | AATGATACGGCGACCACCGAGATCTACACTAATCTTAACACTCTTTCCCTACACGACG | TAATCTTA  |
|                                                  | <b>D507</b>           | AATGATACGGCGACCACCGAGATCTACACCAGGACGTACACTCTTTCCCTACACGACG | CAGGACGT  |
|                                                  | <b>D508</b>           | AATGATACGGCGACCACCGAGATCTACACGTAAGTACACTCTTTCCCTACACGACG   | GTAAGTAC  |
| <b>2nd PCR reverse primers</b>                   |                       |                                                            |           |
|                                                  | <b>D710</b>           | CAAGCAGAAGACGGCATAACGAGATTTGCGGGAGTGACTGGAGTTCAGACGTGT     | TCCGCGAA  |
|                                                  | <b>D711</b>           | CAAGCAGAAGACGGCATAACGAGATGCGCGAGAGTGACTGGAGTTCAGACGTGT     | TCTCAGCGC |
|                                                  | <b>D712</b>           | CAAGCAGAAGACGGCATAACGAGATCTATCGTGTGACTGGAGTTCAGACGTGT      | AGCGATAG  |
| <b>Real Time PCR</b>                             |                       |                                                            |           |
| #5                                               | GST1-RT-F             | GCGTTGGGGATTTGATTAAG                                       |           |
| #6                                               | GST1-RT-R             | TCGAGCACTTTCTTCCAAGC                                       |           |
| #19                                              | CHS-RT-F              | ATGGTTGAAGTCCCAAACTTG                                      |           |
| #20                                              | CHS-RT-R              | CCCATTCTTTAATTGCCTTCT                                      |           |
| #7                                               | CHI-RT-F              | TGGAGCTATTCCTGAAGTAAGCA                                    |           |
| #8                                               | CHI-RT-R              | TGCAGCTGGTGAACACCTT                                        |           |
| #21                                              | F3'5'H-RT-F           | GCTTAAAGCCATGTTTGAATCG                                     |           |
| #22                                              | F3'5'H-RT-R           | CGTTAGCATCTCCGAAATCATC                                     |           |
| #13                                              | DFR-RT-F              | CACGAATTTGACGTTGTTGAAG                                     |           |
| #14                                              | DFR-RT-R              | AAACACCATGACAGCCATGAAT                                     |           |
| #15                                              | ANS-RT-F              | ACCCAGATAGTACCAACCATCG                                     |           |
| #16                                              | ANS-RT-R              | GTTCTTTAATTCGCCGTGACAT                                     |           |
| #17                                              | 5/3'AT-RT-F           | GCAGTCCCTTCTGTTTTACGAC                                     |           |
| #18                                              | 5/3'AT-RT-R           | AGAGTGAGAGACAAAGAGGCCTTA                                   |           |
| #11                                              | MYB3-RT-F             | CACCGGATGAAGAAGATTTGAT                                     |           |
| #12                                              | MYB3-RT-R             | ATCAGTCCTTCTGGGATTCTC                                      |           |
| #9                                               | UBQ-RT-F              | GGGAAGCAGTTGGAAGATGG                                       |           |
| #10                                              | UBQ-RT-R              | TTCAGAAACCACCACGGAGA                                       |           |

**Supplementary Table S4.** Glutathione S-transferase proteins used for constructing the phylogenetic tree in Figure 1A

| <b>Gene name</b> | <b>GST class</b> | <b>Database</b> | <b>Accession Number</b> | <b>Plant species</b>                              |
|------------------|------------------|-----------------|-------------------------|---------------------------------------------------|
| BZ2              | <i>Tau</i>       | NCBI            | NP_001183661.1          | <i>Zea mays</i>                                   |
| GmHSP26-A        | <i>Tau</i>       | NCBI            | NP_001238439.1          | <i>Glycine max</i>                                |
| VvGST1           | <i>Tau</i>       | NCBI            | NP_001268177.1          | <i>Vitis vinifera</i>                             |
| CsGSTb           | <i>Tau</i>       | GeneBank        | MK431868                | <i>Camellia sinensis</i>                          |
| CsGSTc           | <i>Tau</i>       | GeneBank        | MK431869                | <i>Camellia sinensis</i>                          |
| AtGSTU1          | <i>Tau</i>       | NCBI            | XP_020885836.1          | <i>Arabidopsis thaliana</i>                       |
| AtGSTU10         | <i>Tau</i>       | NCBI            | NP_177598.1             | <i>Arabidopsis thaliana</i>                       |
| AtGSTU11         | <i>Tau</i>       | NCBI            | NP_177151.1             | <i>Arabidopsis thaliana</i>                       |
| AtGSTU17         | <i>Tau</i>       | GeneBank        | OAP15816.1              | <i>Arabidopsis thaliana</i>                       |
| AtGSTL1          | <i>Lambda</i>    | NCBI            | NP_001119157.1          | <i>Arabidopsis thaliana</i>                       |
| AtGSTL2          | <i>Lambda</i>    | NCBI            | NP_191064.1             | <i>Arabidopsis thaliana</i>                       |
| AtGSTL3          | <i>Lambda</i>    | NCBI            | NP_195899.1             | <i>Arabidopsis thaliana</i>                       |
| GmGSTL3          | <i>Lambda</i>    | NCBI            | NP_001304515            | <i>Glycine max</i>                                |
| GST1             | <i>Phi</i>       | This study      | LC536038                | <i>Gentiana triflora</i> x <i>G. scabra</i>       |
| AN9              | <i>Phi</i>       | GeneBank        | CAA68993.1              | <i>Petunia</i> x <i>hybrida</i>                   |
| RAP              | <i>Phi</i>       | NCBI            | XP_004288578            | <i>Fragaria vesca</i> subsp. <i>vesca</i>         |
| VvGST4           | <i>Phi</i>       | NCBI            | NP_001267869.1          | <i>Vitis vinifera</i>                             |
| DcGSTF2          | <i>Phi</i>       | GeneBank        | BAM21533.1              | <i>Dianthus caryophyllus</i>                      |
| CkmGST3          | <i>Phi</i>       | GeneBank        | AB682678.1              | <i>Cyclamen persicum</i> x <i>C. purpurascens</i> |
| MdGSTF6          | <i>Phi</i>       | NCBI            | NP_001315851.1          | <i>Malus domestica</i>                            |
| DcGSTF1          | <i>Phi</i>       | GeneBank        | BAM21532.1              | <i>Dianthus caryophyllus</i>                      |
| AcGST1           | <i>Phi</i>       | GeneBank        | MK238757.1              | <i>Actinidia chinensis</i>                        |
| CsGSTa           | <i>Phi</i>       | GeneBank        | QCQ77495.1              | <i>Camellia sinensis</i>                          |
| AtGSTF2          | <i>Phi</i>       | NCBI            | NP_192161.1             | <i>Arabidopsis thaliana</i>                       |
| AtGSTF3          | <i>Phi</i>       | NCBI            | NP_178394.1             | <i>Arabidopsis thaliana</i>                       |
| AtGSTF4          | <i>Phi</i>       | NCBI            | NP_849581.1             | <i>Arabidopsis thaliana</i>                       |
| AtGSTF5          | <i>Phi</i>       | NCBI            | NP_001322019.1          | <i>Arabidopsis thaliana</i>                       |
| AtGSTF6          | <i>Phi</i>       | NCBI            | NP_171792.1             | <i>Arabidopsis thaliana</i>                       |
| AtGSTF7          | <i>Phi</i>       | NCBI            | NP_171791.1             | <i>Arabidopsis thaliana</i>                       |
| AtGSTF8          | <i>Phi</i>       | NCBI            | NP_850479.1             | <i>Arabidopsis thaliana</i>                       |
| AtGSTF9          | <i>Phi</i>       | NCBI            | NP_180643.1             | <i>Arabidopsis thaliana</i>                       |
| AtGSTF10         | <i>Phi</i>       | NCBI            | NP_180644.1             | <i>Arabidopsis thaliana</i>                       |
| AtGSTF11         | <i>Phi</i>       | NCBI            | NP_186969.1             | <i>Arabidopsis thaliana</i>                       |
| AtGSTF12 / TT19  | <i>Phi</i>       | NCBI            | NP_197224.1             | <i>Arabidopsis thaliana</i>                       |
| AtGSTF13         | <i>Phi</i>       | NCBI            | NP_191835.1             | <i>Arabidopsis thaliana</i>                       |
| AtGSTF14         | <i>Phi</i>       | NCBI            | NP_175408.1             | <i>Arabidopsis thaliana</i>                       |
| AtGSTT1          | <i>Theta</i>     | NCBI            | NP_198937.1             | <i>Arabidopsis thaliana</i>                       |
| AtGSTT2          | <i>Theta</i>     | NCBI            | NP_198940.3             | <i>Arabidopsis thaliana</i>                       |
| AtGSTT3          | <i>Theta</i>     | NCBI            | NP_198938.1             | <i>Arabidopsis thaliana</i>                       |
| HsGSTZ1          | <i>Zeta</i>      | NCBI            | AAC33591.1              | <i>Homo sapiens</i>                               |
